# Supplementary material for: Microwave-assisted synthesis of highly luminescent CdSeTe@ZnS–SiO2 quantum dots and their application in the detection of Cu(ii)
Source: Royal Society of Chemistry journal article supplement (doi:10.1039/c2cc16329b), 2012-01-01
Supplement: c2cc16329b.pdf [file c2cc16329b.pdf]

## Supporting Information

# Microwave-assisted synthesis of highly luminescent CdSeTe@ZnS-SiO<sub>2</sub> quantum dots and their application in the detection of Cu(II)<sup>†</sup>

*Yuanyuan Shen<sup>a</sup>, Lingling Li<sup>a</sup>, Qian Lu<sup>a</sup>, Jing Ji<sup>a</sup>, Rong Fei<sup>a</sup>, Jianrong Zhang<sup>a</sup>, E. S. Abdel-Halim<sup>b</sup>, and Jun-Jie Zhu<sup>a\*</sup>*

<sup>a</sup>State Key Lab. of Analytical Chemistry for Life Science, School of Chemistry and Chemical Engineering, Nanjing University, Nanjing, 210093, P. R. China.

<sup>b</sup>Petrochemical Research Chair, Chemistry Department, College of Science, King Saud University, Riyadh 11451, P.O. Box 2455, Kingdom Saudi Arabia

### Experimental Section

#### Materials

Reduced glutathione (GSH, 99%) was purchased from Aladdin Chemistry (China). Tetraethylorthosilicate (TEOS, analytical reagent) was obtained from Sinopharm Chemical Reagent Co. (China). Zinc acetate (Zn(OAc)<sub>2</sub>, analytical reagent) was from Shanghai Meixing Chemical Co.(China). All other reagents were of analytical reagent grade and used without further purification.

#### Characterization

The UV-Vis absorption spectra were obtained using a UV-3600 spectrophotometer (Shimadzu, Japan). The fluorescence measurements were carried out using a Bruker RF-5301PC fluorescence spectrometer. High-resolution transmission electron microscopy (HRTEM) images were taken using a JEOL 2010 electron microscope at an accelerating voltage of 200 kV. The elemental analysis of HQdots was carried out on a J-A1100 ICP-AES system. X-ray photoelectron spectroscopy (XPS) was carried out on an ESCALAB MK II X-ray photoelectron spectrometer. All fourier-transform

infrared (FTIR) spectroscopic measurements were performed on a Bruker model VECTOR22 Fourier-transform spectrometer using KBr pressed disks. Microwave reactions were carried out using a WBFY-201 microwave chemical reactor (Nanjing, Keer).

### Synthesis of CdSeTe@ZnS-SiO<sub>2</sub> quantum dots (HQdots)

The synthetic pathway for the preparation of CdSeTe@ZnS-SiO<sub>2</sub> quantum dots is shown in Scheme 1. Firstly, 10mL mercaptopropionic acid (MPA) capped green-emitting CdSeTe AQdots were precipitated with ethanol and redispersed in ultrapure water with the concentration unchanged. Secondly, CdSeTe AQdots were coated with silica at room temperature through a Stöber method. Ammonia aqueous solution (70 μL 20%),

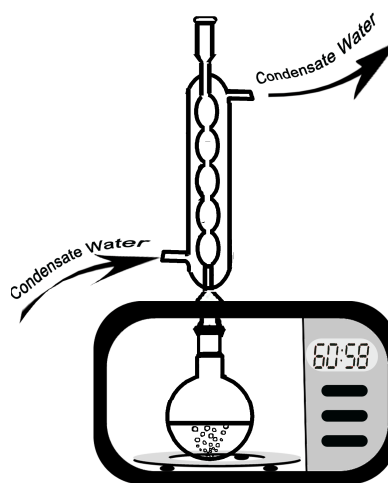

microwave chemical reactor

(70 μL 20%), tetraethylorthosilicate (TEOS, 400 μL), Zn<sup>2+</sup> (0.1 M, 100μL) and GSH (0.1 M, 200 μL) were added into the CdSeTe AQdots solution (pH 10.5). The reaction system was stirred at room temperature for 4 h. Finally, the silica-coated Qdots were refluxed under microwave irradiation (the power was 240W).

**Conventional hydrothermal synthesis was similar to that of microwave-assisted synthesis. The only difference was that, at the final step, the silica-coated Qdots were refluxed at 90 °C instead of microwave irradiation.**

### Fluorescence detection of Cu<sup>2+</sup>

Copper nitrate (Cu(NO<sub>3</sub>)<sub>2</sub>) aqueous solution was used for the determination of Cu<sup>2+</sup>. The solutions with HQdots and different Cu<sup>2+</sup> concentrations were mixed in 50mM phosphate buffer solution (PBS 7.4) and equilibrated for 20 min. The fluorescence intensity was measured at 576nm with the excitation wavelength of 450nm.

### Selectivity measurements

To evaluate the selectivity, the quenching effects of 13 kinds of cations were investigated. The selected inorganic salts is shown in below: potassium chloride, lead

nitrate, aluminum nitrate, barium chloride, calcium chloride, zinc acetate, sodium chloride, magnesium chloride, iron (III) chloride, nickel nitrate, cobalt(II) chloride, cadmium chloride. 1 mM salt solutions were first prepared with ultrapure water, then, diluted with PBS (pH 7.4). Finally, the as-prepared solutions were mixed with HQdots in PBS in the absence of  $\text{Cu}^{2+}$ .

### Sample preparation

The green tea sample was first accurately weighted ( about 2.0 g), then ground, digested with 5mL concentrated nitric acid and heated until the solution became clear. The solution was diluted with water and the pH was adjusted to 7.4, before the determination of  $\text{Cu}^{2+}$  with the HQdots.

### Theoretical calculation of ZnS-monolayer capping on the CdSeTe AQdots

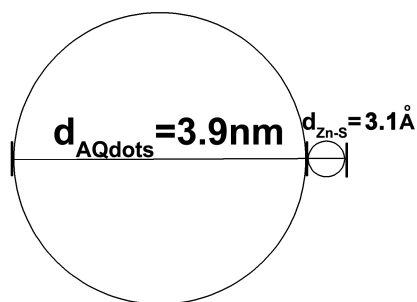

The ZnS was assumed to form a monolayer on the CdSeTe AQdots. The  $d_{\text{Zn-S}}$  was 3.1 Å,<sup>[S11]</sup> while the  $d_{\text{AQdots}}$  was 3.9 nm. Thus, 72.1 mg zinc would be needed for the ZnS-monolayer in 1  $\mu\text{mol}$  HQdots.

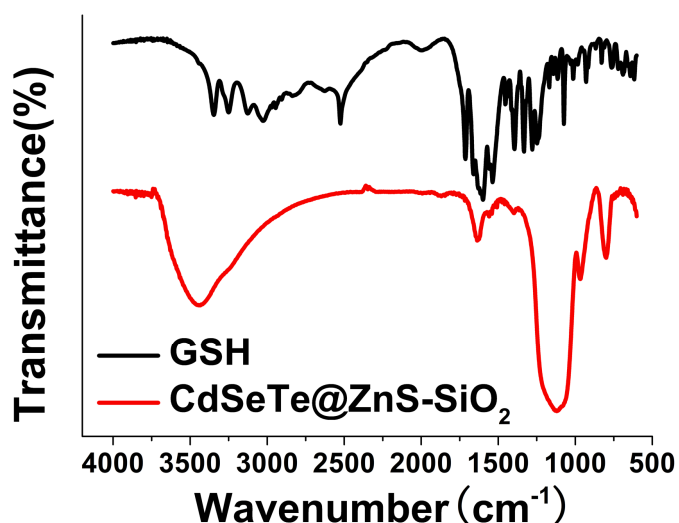

**Fig. S1** FTIR spectra of glutathione and CdSeTe@ZnS-SiO<sub>2</sub> Qdots.

The HQdots were characterized by the FTIR spectra. In Fig. S1, the FTIR spectrum of GSH capped HQdots was similar to that of pure GSH. In both samples, the peaks at 1641 cm<sup>-1</sup> (C=O) and 3450 cm<sup>-1</sup> (COOH) represented the carboxyl group. Furthermore, the peak at 1398 cm<sup>-1</sup> was attributed to C-N group, the peak at 968 cm<sup>-1</sup> was attributed to the N-H group, and the peak at 1554 cm<sup>-1</sup> corresponded to R-CO-NHR. The strong peak at 1117 cm<sup>-1</sup> was ascribed to the silica capping on HQdots. The S-H groups could be confirmed by the peaks at 2517 cm<sup>-1</sup> (S-H) and 795 cm<sup>-1</sup> (C-S). Nevertheless, the peak of S-H group at 2500-2600 cm<sup>-1</sup> disappeared for CdSeTe@ZnS-SiO<sub>2</sub> Qdots, which could be ascribed to the covalent bonds between thiols and HQdots. The results indicated that GSH was capped on the surface of HQdots.

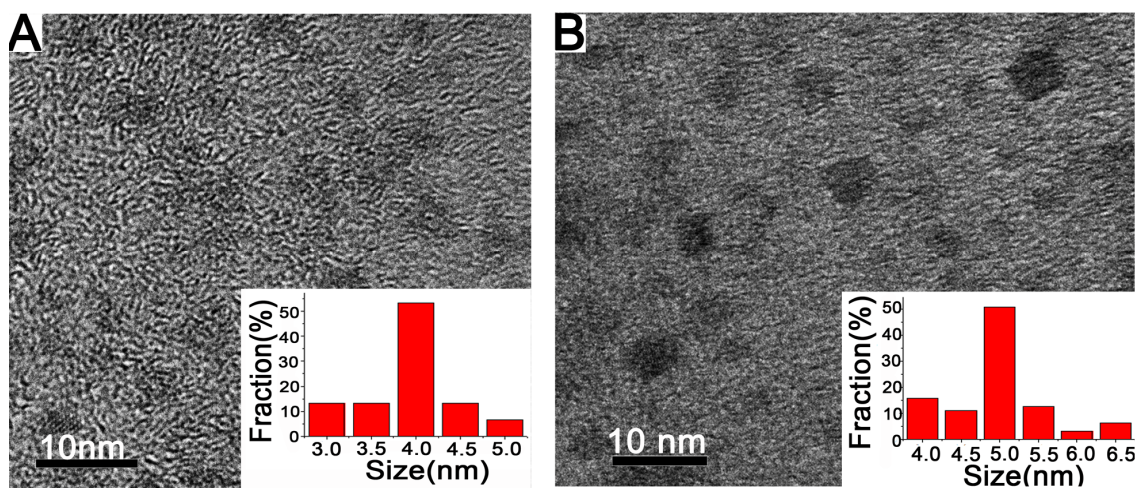

**Fig. S2** The size distributions of the CdSeTe AQdots (A) and CdSeTe@ZnS-SiO<sub>2</sub> Qdots (B).

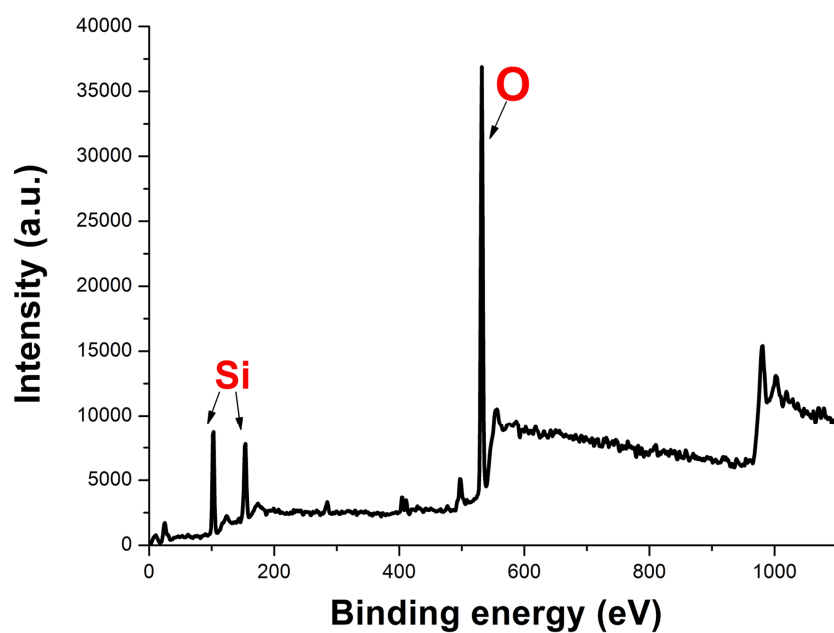

**Fig. S3** X-ray photoelectron spectroscopy of the CdSeTe@ZnS-SiO<sub>2</sub> Qdots.

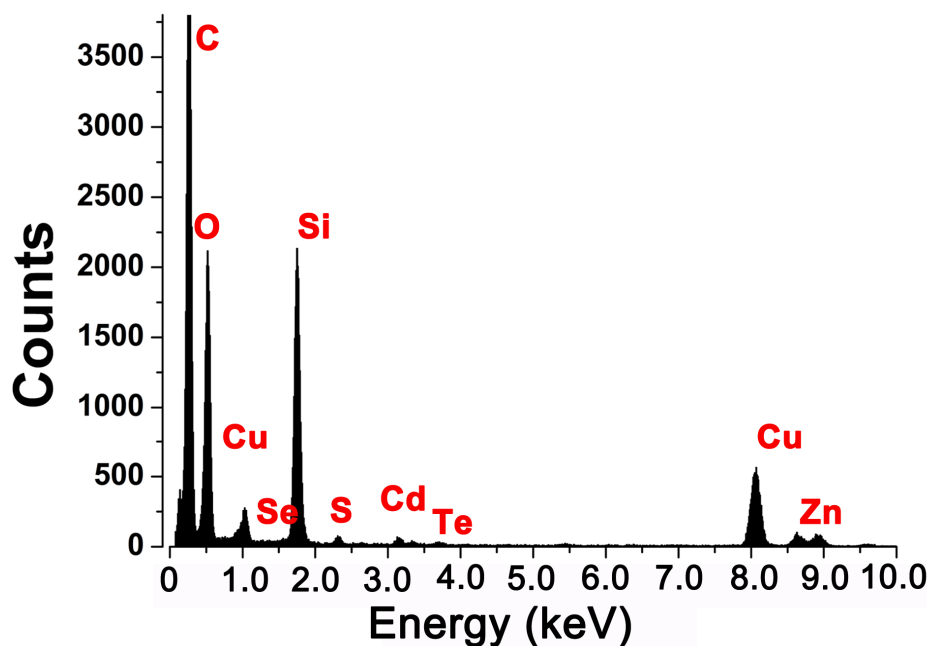

**Fig. S4** EDS spectrum of the CdSeTe@ZnS-SiO<sub>2</sub> Qdots.

The result indicated the presence of S (2.3 keV), Zn (8.6 keV), Si (1.7 keV) and O (0.5 keV).

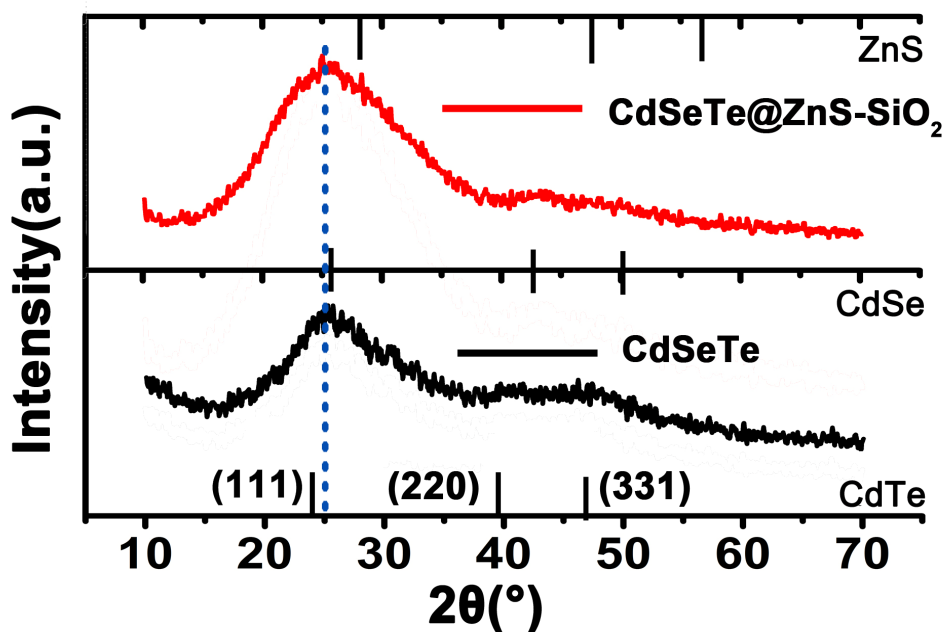

**Fig. S5** XRD patterns of CdSeTe AQdots and CdSeTe@ZnS-SiO<sub>2</sub> Qdots.

(CdTe (JCPDS 15-0770), CdSe (JCPDS 19-0191), ZnS (JCPDS NO. 05-0566))

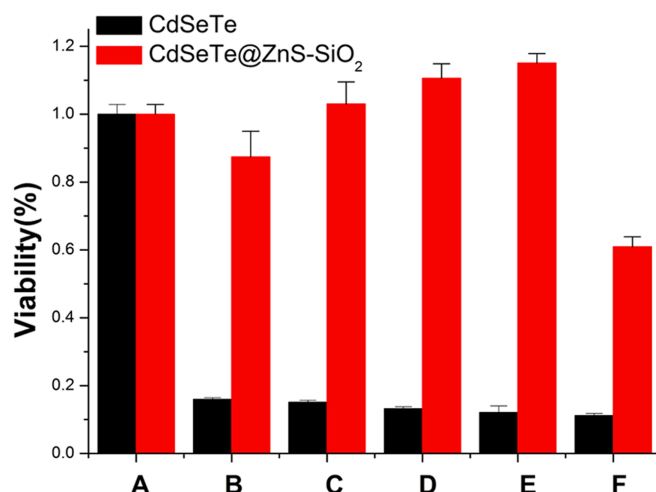

**Fig. S6** Cytotoxicity of CdSeTe AQots and CdSeTe@ZnS-SiO<sub>2</sub> Qdots with different concentrations and incubation for 24 h with HeLa cells, blank (A), 5  $\mu\text{g mL}^{-1}$  (B), 10  $\mu\text{g mL}^{-1}$  (C), 50  $\mu\text{g mL}^{-1}$  (D), 100  $\mu\text{g mL}^{-1}$  (E), 500  $\mu\text{g mL}^{-1}$  (F).

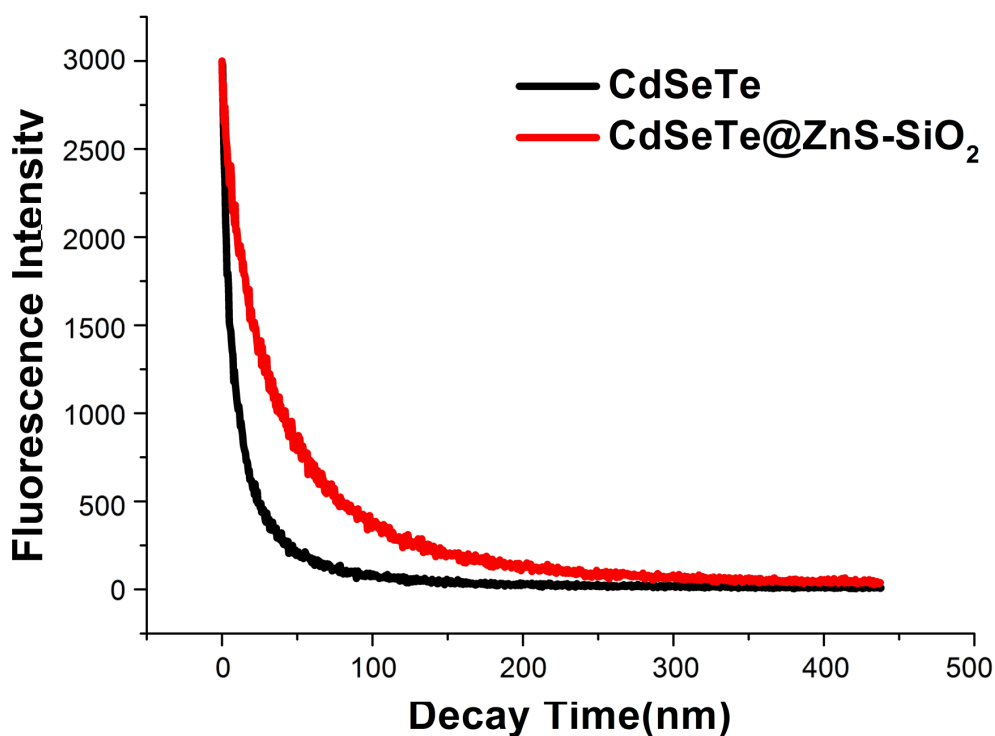

**Fig. S7** PL decay curves of CdSeTe AQdots and CdSeTe@ZnS-SiO<sub>2</sub> Qdots.

PL decay lifetime of CdSeTe AQdots is 57.0 ns, and CdSeTe@ZnS-SiO<sub>2</sub> Qdots is 83.8 ns.

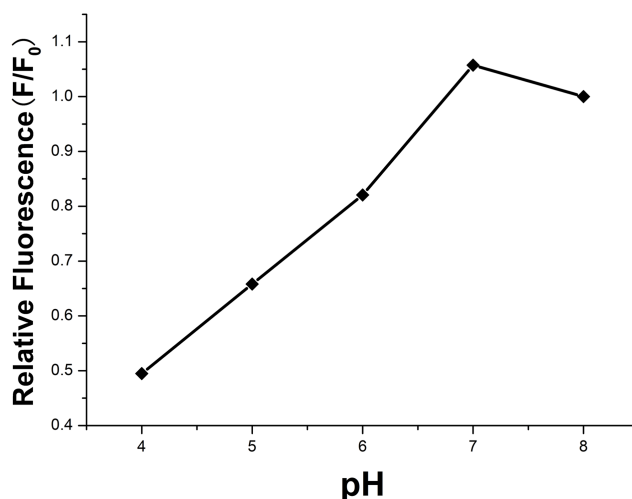

**Fig. S8** Fluorescence intensity of the CdSeTe@ZnS-SiO<sub>2</sub> Qdots ( $\lambda_{\text{max}} = 576$  nm) in PBS (50 mM) at different pH values.

The effect of pH on the HQdots (Fig. S8) suggested that the HQdots were pH-dependent, due to the protonation and deprotonation of the surface binding thiolates.[SI2]The optimum fluorescence intensity was obtained at the pH ranging from 7 to 8.

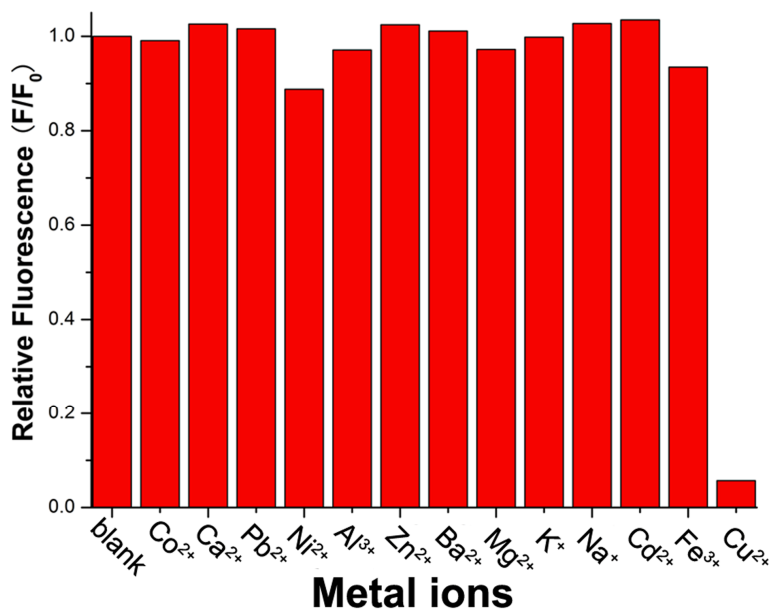

**Fig. S9** Relative fluorescence (F/F<sub>0</sub>) of CdSeTe@ZnS-SiO<sub>2</sub> Qdots solution in the presence of 5  $\mu$ M various metal ions. F<sub>0</sub> and F correspond to the fluorescence intensity of CdSeTe@ZnS-SiO<sub>2</sub> Qdots in the absence and presence of 5  $\mu$ M of various metal ions.



To evaluate the selectivity, the quenching effect of 13 kinds of cations was investigated (Fig. S9). After  $5\ \mu\text{M}\ \text{Cu}^{2+}$  was added into the HQdots solution ( $600\ \text{nM}$ ) (Fig. S9), the fluorescence quenching of the HQdots was observed. This phenomenon shows that the HQdots can be used for the detection of  $\text{Cu}^{2+}$  ions. Obviously, the fluorescence of HQdots had little response to  $5\ \mu\text{M}\ \text{Co}^{2+}$ ,  $\text{Ca}^{2+}$ ,  $\text{Pb}^{2+}$ ,  $\text{Ni}^{2+}$ ,  $\text{Al}^{3+}$ ,  $\text{Zn}^{2+}$ ,  $\text{Ba}^{2+}$ ,  $\text{Mg}^{2+}$ ,  $\text{K}^+$ ,  $\text{Na}^+$ ,  $\text{Cd}^{2+}$ ,  $\text{Fe}^{3+}$ , while the same concentration of  $\text{Cu}^{2+}$  caused almost 92% quenching. This result demonstrated the high selectivity towards  $\text{Cu}^{2+}$ .

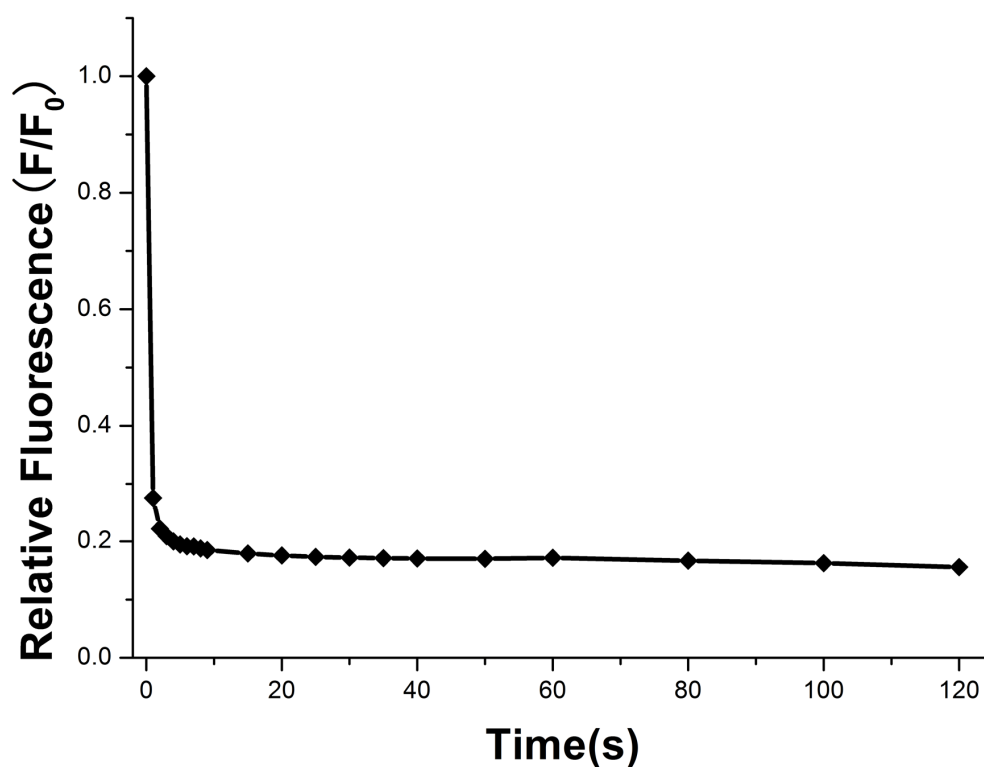

**Fig. S10** Time-dependent fluorescence response of the CdSeTe@ZnS-SiO<sub>2</sub> Qdots to  $\text{Cu}^{2+}$ .

In the case of Fig. S10, fluorescence response was time-dependent. Thus, the fluorescence change was observed after a fixed time of 20 min.

**Tab. S1** PL properties and ICP-MS elemental analysis of the CdSeTe@ZnS-SiO<sub>2</sub> Qdots

| sample | PL peak (nm) | FWHM (nm) | PL QYs (%) | ICP-AES elemental analysis of Zn (mg/1 μmol HQdots) |
|--------|--------------|-----------|------------|-----------------------------------------------------|
| a      | 531          | 51        | 11.9       | -                                                   |
| b      | 524          | 55        | 11.9       | 10.8                                                |
| f      | 576          | 52        | 56.9       | 10.3                                                |

**Tab. S2** *K<sub>sp</sub>* of several compounds mentioned in the detection of Cu<sup>2+</sup> [SI3]

| Compounds | <i>K<sub>sp</sub></i> |
|-----------|-----------------------|
| CuS       | $6.3 \times 10^{-36}$ |
| α-NiS     | $3.2 \times 10^{-19}$ |
| β-NiS     | $1.0 \times 10^{-24}$ |
| γ-NiS     | $2.0 \times 10^{-26}$ |
| CdS       | $8.0 \times 10^{-27}$ |
| α-ZnS     | $1.6 \times 10^{-24}$ |
| β- ZnS    | $2.5 \times 10^{-22}$ |
| PbS       | $8.0 \times 10^{-24}$ |
| α- CoS    | $4.0 \times 10^{-21}$ |
| β- CoS    | $2.0 \times 10^{-25}$ |

(CaS, BaS, MgS and Fe<sub>2</sub>S<sub>3</sub> are easily hydrolyzed, unstable in water system.)

## References

- [SI1] B. O. Dabbousi, J. Rodriguez-Viejo, F. V. Mikulec, J. R. Heine, H. Mattoussi, R. Ober, K. F. Jensen and M. G. Bawendi, *J. Phys. Chem. B*, 1997, **101**, 9463.
- [SI2] M. Y. Gao, S. Kirstein, H. Möhwald, A.L. Rogach, A. Kornowski, A. Eychmüller and H. Weller, *J. Phys. Chem. B*, 1998, **102**, 8360.
- [SI3] J. G. Speight, in *Lange's Handbook of Chemistry*, McGraw-Hill, Wyoming, 16th edn., 2005, vol. 1, ch. 18, pp. 1331-1342.
